# Supplementary material for: PODO447: a novel antibody to a tumor-restricted epitope on the cancer antigen podocalyxin
Source: PubMed Central journal article supplement — J Immunother Cancer. 2020 Nov 26;8(2):e001128. doi: 10.1136/jitc-2020-001128 (PMC7692987; doi:10.1136/jitc-2020-001128), 2020-11-26
Supplement: jitc-2020-001128supp001.pdf [file jitc-2020-001128supp001.pdf]

Suppl. Table 1. Full-length and Podxl- $\Delta$ Mucin sequences

| Construct name                        | Sequence (5' – 3')                                                                                                                                                                                                                                                                                                                                                                                                                                                                                                                                                                                                                                                                                                                                                                                                                                                                                                                                                                                                                                                                                                                                                                                                                                                                                                                                                                                                                                                                                                                                                                                                                                                                                                                                                    |
|---------------------------------------|-----------------------------------------------------------------------------------------------------------------------------------------------------------------------------------------------------------------------------------------------------------------------------------------------------------------------------------------------------------------------------------------------------------------------------------------------------------------------------------------------------------------------------------------------------------------------------------------------------------------------------------------------------------------------------------------------------------------------------------------------------------------------------------------------------------------------------------------------------------------------------------------------------------------------------------------------------------------------------------------------------------------------------------------------------------------------------------------------------------------------------------------------------------------------------------------------------------------------------------------------------------------------------------------------------------------------------------------------------------------------------------------------------------------------------------------------------------------------------------------------------------------------------------------------------------------------------------------------------------------------------------------------------------------------------------------------------------------------------------------------------------------------|
| <b>Full-length Podxl (WT)</b>         | <p>GCCACCATGGCCTTGACCTTCTCCTCCTTTGGGGCATGCTGGGTCCAGGTGGCGAGCCCAGATTACAAGGACGACGATGACAAGGGCGGCG<br/> GATCCAGATCTGCGGCCGCCCGTCGCCGTCGCCCTCCAGAAATGCAACCCAGACTACTACGGACTCATCTAACAAAACAGCACCGACTCCAGCA<br/> TCCAGTGTACCATCATGGCTACAGATACAGCCCAGCAGAGCACAGTCCCCACTTCCAAGGCCAACGAAATCTTGGCCTCGGTCAAGGGCACCAC<br/> CCTTGGTGTATCCAGTGA CTACCGGGGACTACAACCCTGGCTCAGCAAGTCTCAGGCCAGTCAACACTACCGTGGCTAGAGGAGGGGCTCA<br/> GGCAACCCTACTACCACCATCGAGAGCCCCAAGAGCACAAAAGTGCAGACACCACTACAGTTGCAACCTCCACAGCCACAGCTAAACCTAACAC<br/> CACAAGCAGCCAGAATGGAGCAGAAGATAACAACAACTCTGGGGGGAAAAGCAGCCACAGTGTGACCACAGACCTCACATCCACTAAGGCAGA<br/> ACATCTGACGACCCCTCACCTACAAGTCCACTTAGCCCCGACAACCCACTTCGACGCATCCTGTGGCCACCCCAACAAGCTCGGGACATGACCA<br/> TCTTATGAAAATTTCAAGCAGTTCAAGCACTGTGGCTATCCCTGGCTACACCTTACAAGCCGGGGATGACCACCACCCTACCGTCATCGTTAT<br/> CTCGCAAAGAACTCAACAGACCTCCAGTCAGATGCCAGCCAGCTCTACGGCCCTTCTCCAGGAGACAGTGCAGCCCACGAGCCCGCAACGG<br/> CATTGAGAACACCTACCCTGCCAGAGACCATGAGTCCAGCCCCACAGCAGCATCAACTACCCACCGATAACCCAAAACACCTTCTCCACTGTGG<br/> CTCATGAGAGTA ACTGGGCAAAGTGTGAGGATCTTGAGACACAGACACAGAGTGAGAAGCAGCTCGTCTGAACCTCACAGGAAAACACCTCTG<br/> TGCAGGGGGCGCTTCGGATGAGAAATTGATCTCACTGATATGCCGAGCAGTCAAAGCCACCTTCAACCCGGCCCAAGATAAGTGCGGCATACGG<br/> CTGGCATCTGTTCCAGGAAGTCAGACCGTGGTCGTCAAAGAAATCACTATTCACTAAGCTCCCTGCCAAGGATGTGTACGAGCGGCTGAAGGA<br/> CAAATGGGATGAACTAAAGGAGGCAGGGGTCAAGTACATGAAGCTAGGGGACCAGGGGCCACCGGAGGAGGCCGAGGACCGCTTACGATGC<br/> CCCTCATCATACCATCGTCTGCATGGCATATTCTGCTCCTCGTGGCGGCCCTCTATGGGTGCTGCCACCAGCGCCTCTCCAGAGGAAGGACC<br/> AGCAGCGGCTAACAGAGGAGCTGCAGACAGTGGAGAATGGTTACCATGACAACCCAACACTGGAAGTGATGGAGACCTTCTGAGATGCAGG<br/> AGAAGAAGGTGGTCAGCCTCAACGGGGAGCTGGGGGACAGCTGGATCGTCCCTCTGGACAACCTGACCAAGGACGACCTGGATGAGGAGGAA<br/> GACACACACCTCTAG</p> |
| <b>Podxl-<math>\Delta</math>Mucin</b> | <p>GCCACCATGGCCTTGACCTTCTCCTCCTTTGGGGCATGCTGGGTCCAGGTGGCGAGCCCAGATTACAAGGACGACGATGACAAGGGCGGCG<br/> GATCCAGATCTGCGGCCGCCCATGAGAGTAACTGGGCAAAGTGTGAGGATCTTGAGACACAGACACAGAGTGAGAAGCAGCTCGTCTGAACCT<br/> CACAGGAAACACCCTCTGTGCAGGGGGCGCTTCGGATGAGAAATTGATCTCACTGATATGCCGAGCAGTCAAAGCCACCTTCAACCCGGCCCAA<br/> GATAAGTGCGGCATAACGGCTGGCATCTGTTCCAGGAAGTCAGACCGTGGTCGTCAAAGAAATCACTATTCACTAAGCTCCCTGCCAAGGATGT<br/> GTACGAGCGGCTGAAGGACAAATGGGATGAACTAAAGGAGGCAGGGGTCAAGTACATGAAGCTAGGGGACCAGGGGCCACCGGAGGAGGCC<br/> GAGGACCGCTTACGATGCCCTCATCATACCATCGTCTGCATGGCATATTCTGCTCCTCGTGGCGGCCCTCTATGGGTGCTGCCACCAGCGC<br/> CTCTCCAGAGGAAGGACCAGCAGCGGCTAACAGAGGAGCTGCAGACAGTGGAGAATGGTTACCATGACAACCCAACACTGGAAGTGATGGAG<br/> ACCTTCTGAGATGCAGGAGAAGAAGGTGGTCAGCCTCAACGGGGAGCTGGGGGACAGCTGGATCGTCCCTCTGGACAACCTGACCAAGGAC<br/> GACCTGGATGAGGAGGAAGACACACACCTCTAG</p>                                                                                                                                                                                                                                                                                                                                                                                                                                                                                                                                                                                                                                                                                                                                                                                                                                                                                                             |

**Suppl. Table 2. Summary of PODO447 cross reactivity with control tissues**

| Tissue                                                                               | PODO447                         |                    | Neg Control |         |
|--------------------------------------------------------------------------------------|---------------------------------|--------------------|-------------|---------|
|                                                                                      | 2µg/ml                          | 20µg/ml            | 2µg/ml      | 20µg/ml |
| <b>Cryosections of A-172 cells</b><br>Positive control material                      | Frequent<br>(3-4+)              | Frequent<br>(3-4+) | Neg         | Neg     |
| <b>Cryosections of MDA-MB-231 <i>PODXL-KO</i> cells</b><br>Negative control material | Neg                             | Neg                | Neg         | Neg     |
| <b>Cryosections of human fetal kidney</b><br>Ancillary control material              | Rare to<br>occasional<br>(1-3+) | Rare<br>(1-3+)     | Neg         | Neg     |

The frequency of cells with staining was identified as follows: no staining (Neg), very rare (<1% cells of a particular cell type), rare (1-5% of cells of a particular cell type), rare to occasional (5-25% of cells of a particular cell type), occasional (>25-50% of cells of a particular cell type), occasional to frequent (>59-75% of cells of a particular cell type), frequent (>75-100% of cells of a particular cell type). Intensity of staining was scored as: 1+ = weak, 2+ = moderate, 3+ = strong, 4+ = intense, Neg = Negative. HuIgG1 was used as negative (Neg) control.

**Suppl. Table 3. Summary of PODO447 cross-reactivity with normal human tissues.**

| <b>Tissue</b>           | <b>PODO447</b>         | <b>Neg Control</b> |
|-------------------------|------------------------|--------------------|
| <b>Adrenal gland</b>    | Very rare (1)          | Very rare (1)      |
| <b>Bladder</b>          | Neg                    | Neg                |
| <b>Bone</b>             | Neg                    | Neg                |
| Bone marrow             |                        |                    |
| <b>Brain</b>            |                        |                    |
| Cerebellum              | Neg                    | Neg                |
| Cerebral Cortex         | Neg                    | Neg                |
| <b>Breast</b>           | Rare to occasional (2) | Neg                |
| <b>Fallopian Tube</b>   | Rare to occasional (1) | Neg                |
| <b>GI – Track</b>       |                        |                    |
| Esophagus               | Neg                    | Neg                |
| Stomach                 | Rare (2)               | Rare (1)           |
| Small Intestine         | Neg                    | Neg                |
| Colon                   | Neg                    | Neg                |
| Rectum                  | Rare (1)               | Rare (1)           |
| <b>Head and neck</b>    | Rare (2)               | Rare (1)           |
| Salivary gland          |                        |                    |
| <b>Heart</b>            | Neg                    | Neg                |
| <b>Kidney</b>           |                        |                    |
| Cortex                  | Occasional (1)         | Occasional (1)     |
| Medulla                 | Rare to occasional (2) | Neg                |
| <b>Liver</b>            | Neg                    | Neg                |
| <b>Lung</b>             | Neg                    | Neg                |
| <b>Ovary</b>            | Neg                    | Neg                |
| <b>Pancreas</b>         | Neg                    | Rare (1)           |
| <b>Parathyroid</b>      | Neg                    | Neg                |
| <b>Peripheral nerve</b> | Neg                    | Neg                |
| <b>Pituitary gland</b>  | Neg                    | Neg                |
| <b>Placenta</b>         | Neg                    | Neg                |
| <b>Prostate</b>         | Neg                    | Neg                |
| <b>Skeletal muscle</b>  | Neg                    | Neg                |
| <b>Skin</b>             | Neg                    | Neg                |
| <b>Spinal cord</b>      | Neg                    | Neg                |
| <b>Spleen</b>           | Neg                    | Neg                |
| <b>Testis</b>           | Neg                    | Neg                |
| <b>Thymus</b>           | Neg                    | Neg                |
| <b>Thyroid</b>          | Neg                    | Neg                |
| <b>Tonsil</b>           | Neg                    | Neg                |
| <b>Ureter</b>           | Neg                    | Neg                |

| Tissue        | PODO447       | Neg Control |
|---------------|---------------|-------------|
| <b>Uterus</b> |               |             |
| Cervix        | Neg           | Neg         |
| Endometrium   | Very rare (2) | Neg         |

The frequency of cells with staining was identified as follows: negative (Neg), very rare (<1% cells of a particular cell type), rare (1-5% of cells of a particular cell type), rare to occasional (5-25% of cells of a particular cell type), occasional (>25-50% of cells of a particular cell type), occasional to frequent (>59-75% of cells of a particular cell type), frequent (>75-100% of cells of a particular cell type). Blood vessel (endothelium) staining is detailed under each individual tissue. The intensity of the staining as indicated in brackets, was scored as: 1+ = weak, 2+ = moderate, 3+ = strong, 4+ = intense. pavalizumab was used as negative (Neg) isotype control.

**Suppl. Table 4. Charles River Laboratory summary report of PODO447 cross-reactivity with normal human tissues.**

| Tissue                  | PODO447   | Neg Control | Pos Control |
|-------------------------|-----------|-------------|-------------|
| <b>Brain</b>            |           |             |             |
| <b>Cerebellum</b>       | Neg       | Neg         | Pos         |
| <b>Cerebral Cortex</b>  | Neg       | Neg         | Pos         |
| <b>Breast</b>           | Neg       | Neg         | Pos         |
| <b>Colon</b>            | Neg       | Neg         | Pos         |
| <b>Fallopian Tube</b>   | Rare      | Neg         | Pos         |
| Epithelium, mucosa      | (1-2+)    |             |             |
| <b>GI – Track</b>       |           |             |             |
| <b>Esophagus</b>        | Neg       | Neg         | Pos         |
| <b>Small Intestine</b>  | Rare      | Neg         | Pos         |
| Epithelium, mucosa      | (1-2+)    |             |             |
| <b>Stomach</b>          | Neg       | Neg         | Pos         |
| <b>Heart</b>            | Neg       | Neg         | Pos         |
| <b>Kidney</b>           | Very rare | Neg         | Pos         |
| Podocytes               | (2-3+)    |             |             |
| <b>Liver</b>            | Neg       | Neg         | Pos         |
| <b>Ovary</b>            | Neg       | Neg         | Pos         |
| <b>Skin</b>             | Very rare | Neg         | Pos         |
| Epithelium, sweat gland | (1+)      |             |             |

PODO447 staining was assessed as Neg = Negative, Pos = Positive. The frequency of cells with PODO447 positive staining was identified as follows: very rare (<1% cells of a particular cell type), rare (1-5% of cells of a particular cell type), rare to occasional (5-25% of cells of a particular cell type), occasional (>25-50% of cells of a particular cell type), occasional to frequent (>59-75% of cells of a particular cell type), frequent (>75-100% of cells of a particular cell type). Blood vessel (endothelium) staining is detailed under each individual tissue. Frequency modifiers were included to provide the approximate percentage staining of expected numbers of that cell type or tissue element at that location. The intensity of the staining was scored as: 1+ = weak, 2+ = moderate, 3+ = strong, 4+ = intense. HuIgG1 was used as negative (Neg) control, and anti- $\beta_2$ -microglobulin as tissue staining (Pos) control.

**Suppl. Table 5 Complete list of glycans binding to PODO447.**

| <b>Median RFU</b> | <b>STD</b> | <b>Glycan Structure</b>                                           | <b>Common Name</b>           | <b>Short Name</b> |
|-------------------|------------|-------------------------------------------------------------------|------------------------------|-------------------|
| 46864.3           | 11346.6    | GalNAc $\beta$ 1-3Gal $\alpha$ 1-4Gal $\beta$ 1-4Glc $\beta$ -sp3 | Gb4, P                       | Gb4               |
| 37815             | 10288      | GalNAc $\beta$ -sp10                                              | $\beta$ -GalNAc              | bAN-PEG2          |
| 37155             | 6796.1     | (GalNAc $\beta$ -PEG <sub>2</sub> ) <sub>3</sub> - $\beta$ -DD    | (ANb-PEG2) <sub>3</sub>      |                   |
| 26355             | 3341       | GalNAc $\beta$ -sp3                                               | $\beta$ -GalNAc              | bAN               |
| 19964             | 6979       | GalNAc $\alpha$ 1-OSer                                            | TnSer                        | TnSer             |
| 10932             | 3718       | GalNAc $\beta$ 1-4GlcNAc $\beta$ -sp2                             | LacdiNAc                     | LacdiNAc-C2       |
| 5723              | 1949       | GalNAc $\alpha$ 1-3Gal $\beta$ -sp3                               | A <sub>di</sub>              | Adi               |
| 3390              | 1440       | Fuc $\alpha$ 1-2Gal $\beta$ -sp3                                  | H <sub>di</sub>              | Hdi               |
| 2173              | 670        | GalNAc $\beta$ 1-3GalNAc $\beta$ -sp3                             | para-Fs                      | para-Fs           |
| 1646              | 708        | Fuc $\alpha$ 1-2(3-O-Su)Gal $\beta$ -sp3                          | 3-O-Su-H <sub>di</sub>       | Hdi3Su            |
| 1355.3            | 633.30     | Neu5Gc $\alpha$ 2-6GalNAc $\alpha$ -sp3                           | Neu5Gc-T <sub>n</sub>        | Neu5GcTn          |
| 1329              | 31.1       | Fuc $\alpha$ 1-2Gal $\beta$ 1-4GlcNAc $\beta$ -sp3                | H (type 2)                   | Htype2            |
| 1260              | 481        | GalNAc $\beta$ 1-4GlcNAc $\beta$ -sp3                             | LacdiNAc                     | LacdiNAc          |
| 1215              | 465.1      | 6-O-Su-Gal $\beta$ 1-3(6-O-Su)GlcNAc $\beta$ -sp2                 | 6,6'-di-O-Su-Le <sup>c</sup> | LeC6,6'Su2        |
| 1062              | 373        | GlcNAc $\beta$ 1-3GalNAc $\alpha$ -sp3                            | core 3                       | core3             |
| 1022              | 423        | Gala1-3Gal $\beta$ -sp3                                           | B <sub>di</sub>              | Bdi               |
| 790               | 280        | GalNAc $\beta$ 1-4(6-O-Su)GlcNAc $\beta$ -sp2                     | 6-O-Su-LacdiNAc              | LacdiNAc6Su       |
| 713               | 224.5      | Gal $\alpha$ 1-3Gal $\beta$ 1-4GlcNAc $\beta$ -sp3                | Galili (tri)                 | Galili3           |
| 687.7             | 215.5      | GlcNAc $\beta$ 1-6(Gal $\beta$ 1-3)GalNAc $\alpha$ -sp3           | core 2                       | core2             |
| 602.7             | 272.9      | 4,6-O-Su <sub>2</sub> -Gal $\beta$ 1-4GlcNAc $\beta$ -sp3         | 4',6'-di-O-Su-LN             | LN4'6'Su2         |
| 493               | 197        | ManNAc $\beta$ -sp4                                               | $\beta$ -ManNAc              | bMN               |

| Median RFU | STD   | Glycan Structure                                                                                             | Common Name                                | Short Name              |
|------------|-------|--------------------------------------------------------------------------------------------------------------|--------------------------------------------|-------------------------|
| 450        | 160.6 | 6-O-Su-GalNAc $\beta$ 1-4GlcNAc $\beta$ -sp3                                                                 | 6'-O-Su-LacdiNAc                           | LacdiNAc6'Su            |
| 367        | 112   | 6-O-Su-Gal $\beta$ 1-4Glc $\beta$ -sp2                                                                       | 6'-O-Su-Lac                                | Lac6'Su                 |
| 364        | 115.8 | Gala1-3(Fuc $\alpha$ 1-2)Gal $\beta$ -sp5                                                                    | Btri-C8                                    | Btri-C8                 |
| 360        | 114   | GlcNAc $\beta$ 1-6GalNAc $\alpha$ -sp3                                                                       | core 6                                     | core6                   |
| 324.3      | 93.0  |                                                                                                              | $\alpha$ 1-3, $\alpha$ 1-6-mannotriose-BSA |                         |
| 285        | 101.2 | 3,6-O-Su <sub>2</sub> -Gal $\beta$ 1-4(6-O-Su)GlcNAc $\beta$ -sp2                                            | 3',6,6'-tri-O-Su-LN                        | LN3'66'Su3              |
| 274.3      | 98.8  | GalNAc $\beta$ 1-4Gal $\beta$ 1-4Glc $\beta$ -sp3                                                            | GA <sub>2</sub> , GgOse <sub>3</sub>       | GA2                     |
| 227.3      | 71.1  | Gal $\beta$ 1-3(Fuc $\alpha$ 1-4)GlcNAc $\beta$ -sp3                                                         | Le <sup>a</sup>                            | LeA                     |
| 220        | 33    | 4-O-Su-Gal $\beta$ 1-4GlcNAc $\beta$ -sp2                                                                    | 4'-O-Su-LN                                 | LN4'Su-C2               |
| 208.3      | 23.1  |                                                                                                              | Sia-Lex-BSA(NPG1403)                       |                         |
| 170.3      | 27.2  | 3'-Sialyllactose-ADP-HSA, Isosep60/67                                                                        | 3'-Sialyllactose-HSA                       |                         |
| 149        | 50    | 6'-O-Su-Gal $\beta$ 1-4GlcNAc $\beta$ -sp3                                                                   | 6'-O-Su-LN                                 | LN6'Su                  |
| 142.7      | 10.7  | Lacto-N-fucopentaose III-ADP-HSA (LNF III-HSA)                                                               | Lex-HSA                                    |                         |
| 116.7      | 9.9   |                                                                                                              | SO3-Lea-15atom-HSA                         |                         |
| 113        | 21.5  | Neu5Ac $\alpha$ 2-8Neu5Ac $\alpha$ 2-8Neu5Ac $\alpha$ 2-3(GalNAc $\beta$ 1-4)Gal $\beta$ 1-4Glc $\beta$ -sp2 | GT2                                        | GT2                     |
| 110        | 6.4   | A-Hexasaccharide-APD-HSA                                                                                     | A-hexa-HSA                                 |                         |
| 109.7      | 8.1   | GlcNAc $\beta$ 1-3Gal $\beta$ 1-3GlcNAc $\beta$ -sp3                                                         | GlcNAc3'Le <sup>c</sup>                    | GlcNAc3'Le <sup>c</sup> |
| 108.7      | 13.7  | Lacto-N-neotetraose-ADP-HSA (lactosamin)                                                                     | LNnT-HSA                                   |                         |
| 104.3      | 6.5   | Lacto-N-tetraose-ADP-HSA, Isosep60/97                                                                        | LNT-HSA                                    |                         |
| 103.3      | 17.5  | GlcNAc $\alpha$ 1-3Gal $\beta$ 1-4GlcNAc $\beta$ -sp3                                                        | GNa3'LN                                    | GNa3'LN                 |
| 103        | 5.1   | Sialyl-Lea-APD-HSA (19-9 antigen, Sialyl-Lea)                                                                | Sia-Lea-HSA                                |                         |
| 92.3       | 8.4   | 4,6-O-Su <sub>2</sub> -GalNAc $\beta$ 1-4-(3-O-Ac)GlcNAc $\beta$ -sp3                                        | 4',6'-di-O-Su-LacdiNAc                     | 3Ac-LacdiNAc4',6'Su2    |
| 78.3       | 21.4  | 3-O-Su-GalNAc $\beta$ 1-4GlcNAc $\beta$ -sp3                                                                 | 3'-O-Su-LacdiNAc                           | LacdiNAc3'Su            |

**Suppl. Table 6 Clinicopathological characteristics of the epithelial ovarian carcinoma TMA**

| <b>Parameter</b>                  |            |
|-----------------------------------|------------|
| <b>Histological cell type (n)</b> |            |
| High grade serous                 | 158        |
| Clear cell                        | 25         |
| Endometrioid                      | 27         |
| Mucinous                          | 5          |
| Low grade serous                  | 4          |
| <b>Grade (n)</b>                  |            |
| 1                                 | 12         |
| 2                                 | 23         |
| 3                                 | 184        |
| <b>FIGO stage (n)</b>             |            |
| I                                 | 37         |
| II                                | 31         |
| III                               | 130        |
| IV                                | 21         |
| <b>Age</b>                        |            |
| Range                             | 28 – 90    |
| Median                            | 59         |
| Mean                              | 60 (12.14) |
