# Supplementary figures and images for: PODO447: a novel antibody to a tumor-restricted epitope on the cancer antigen podocalyxin
Source: PubMed Central journal article supplement — J Immunother Cancer. 2020 Nov 26;8(2):e001128. doi: 10.1136/jitc-2020-001128 (PMC7692987; doi:10.1136/jitc-2020-001128), 2020-11-26

## Suppl Fig 1

Created with SnapGene®

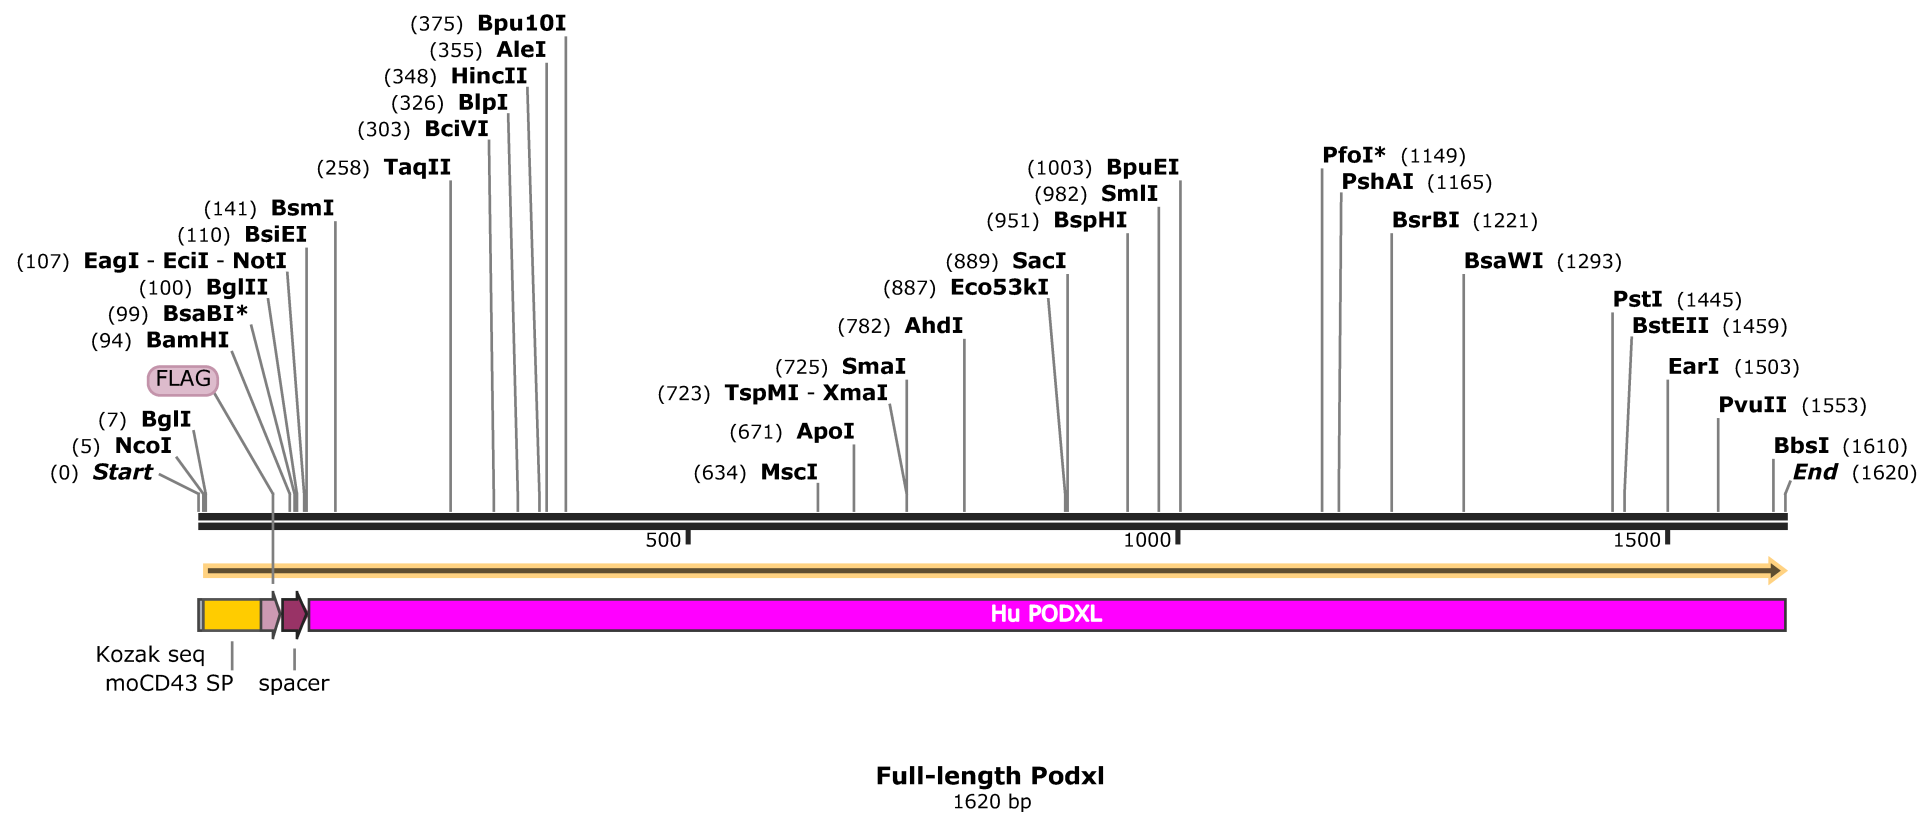

## Suppl Fig 1

Created with SnapGene®

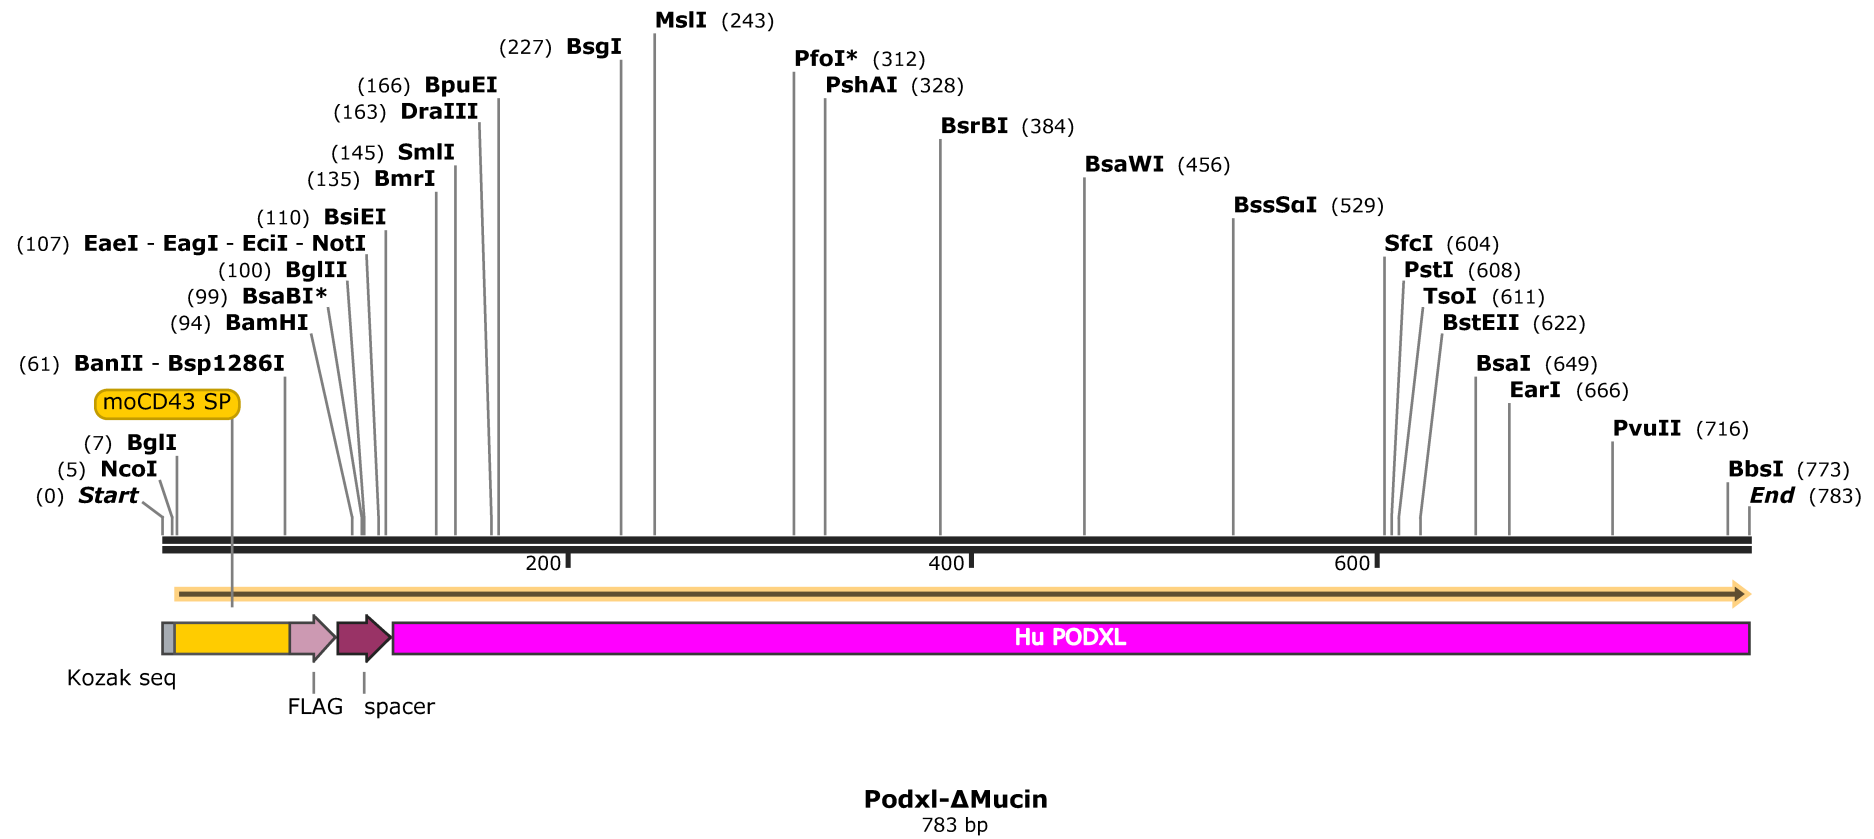

Supplement: jitc-2020-001128supp002.pdf [file jitc-2020-001128supp002.pdf]

## Suppl Fig 2

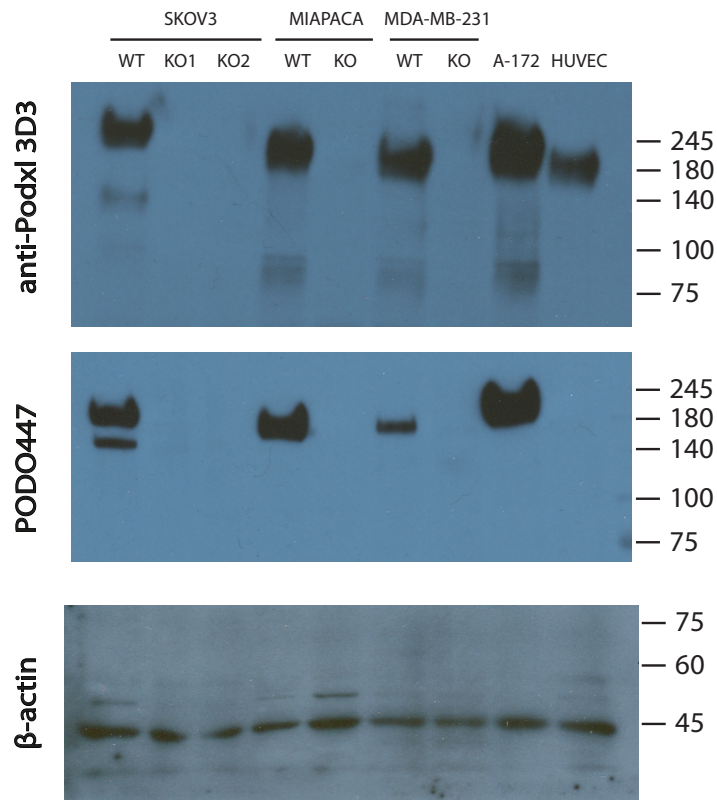

Supplement: jitc-2020-001128supp004.pdf [file jitc-2020-001128supp004.pdf]

## Suppl Fig 3

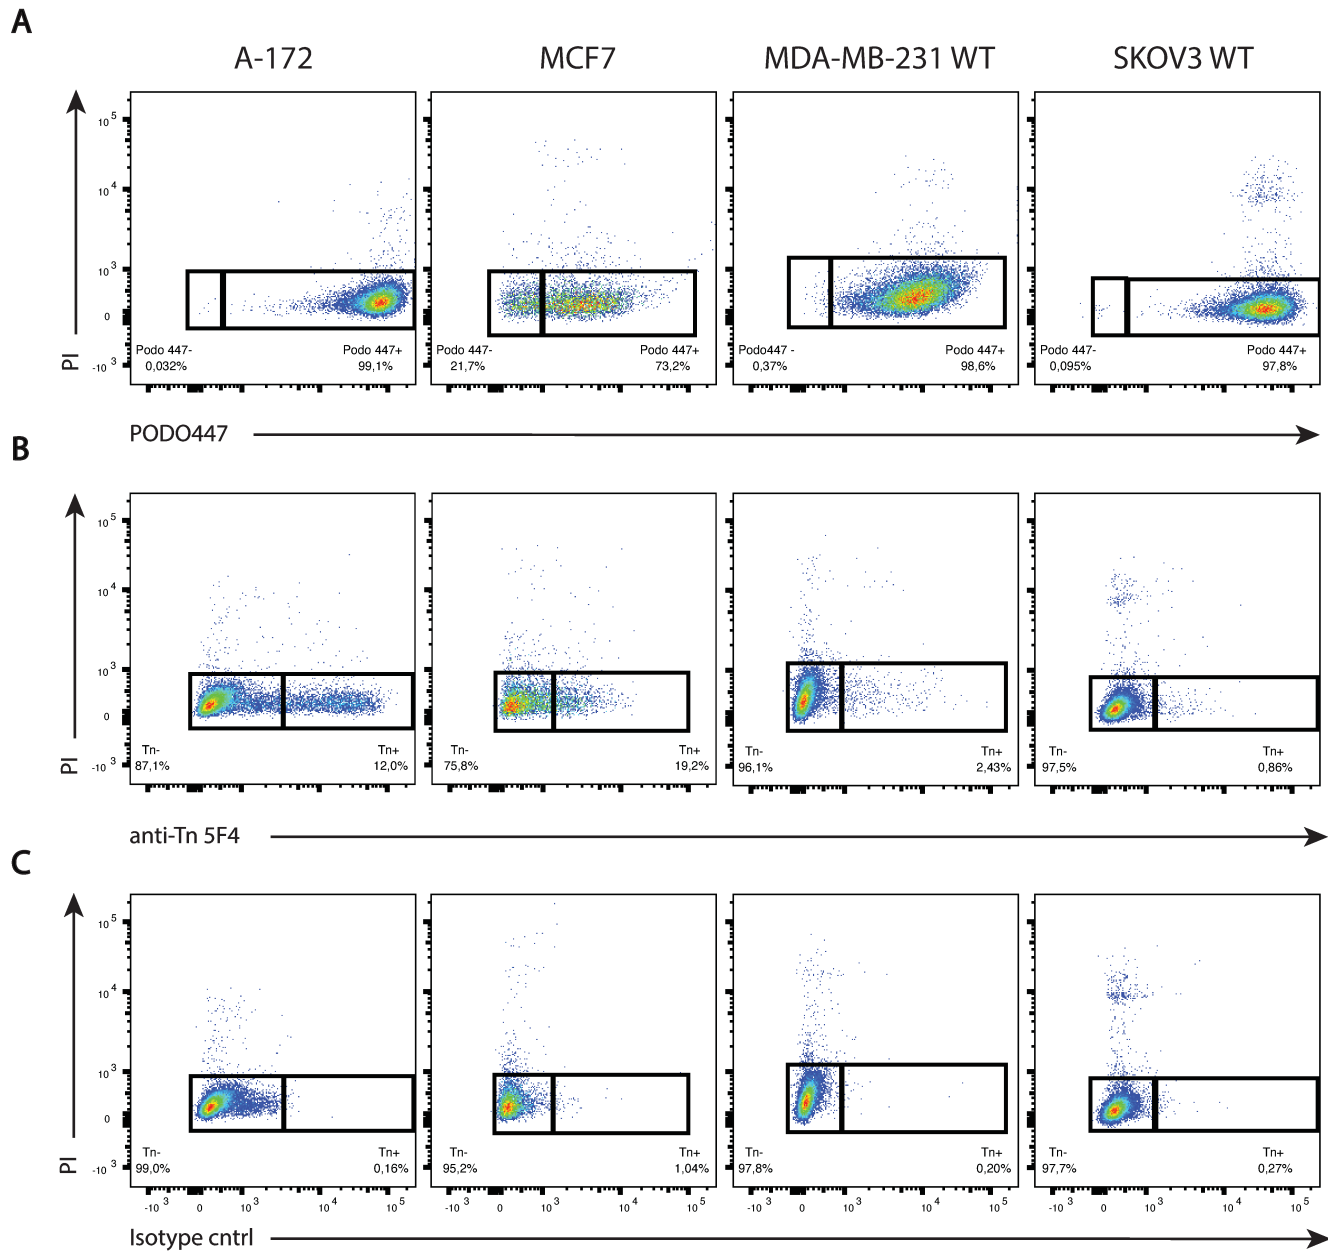

Supplement: jitc-2020-001128supp005.pdf [file jitc-2020-001128supp005.pdf]

## Suppl Fig 4

A

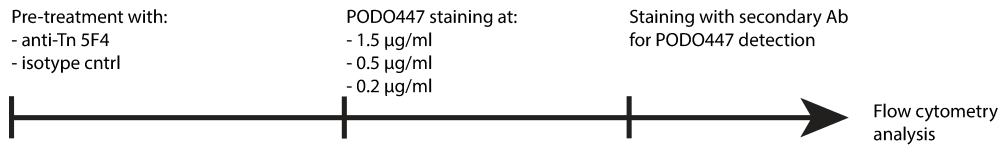

B

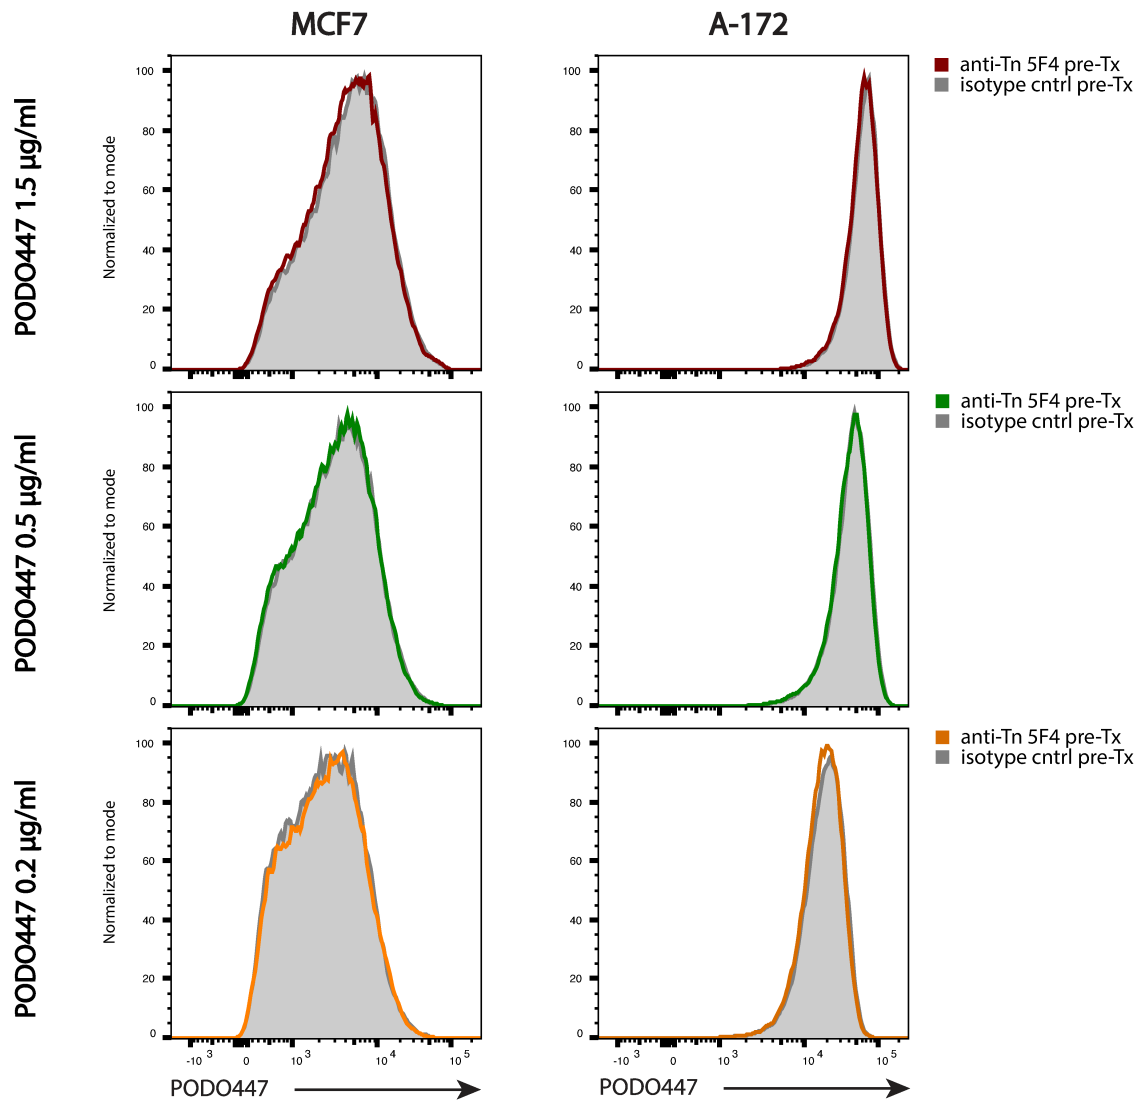

Supplement: jitc-2020-001128supp006.pdf [file jitc-2020-001128supp006.pdf]

## Suppl Fig 5

A

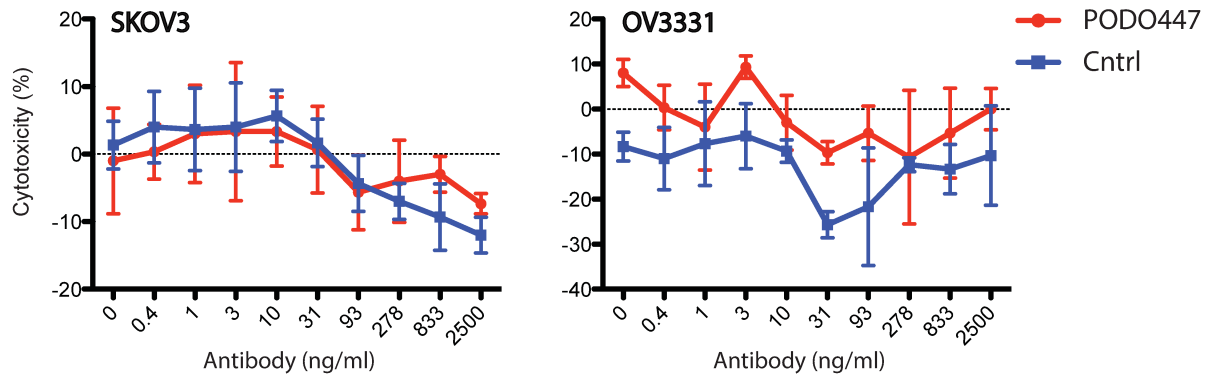

B

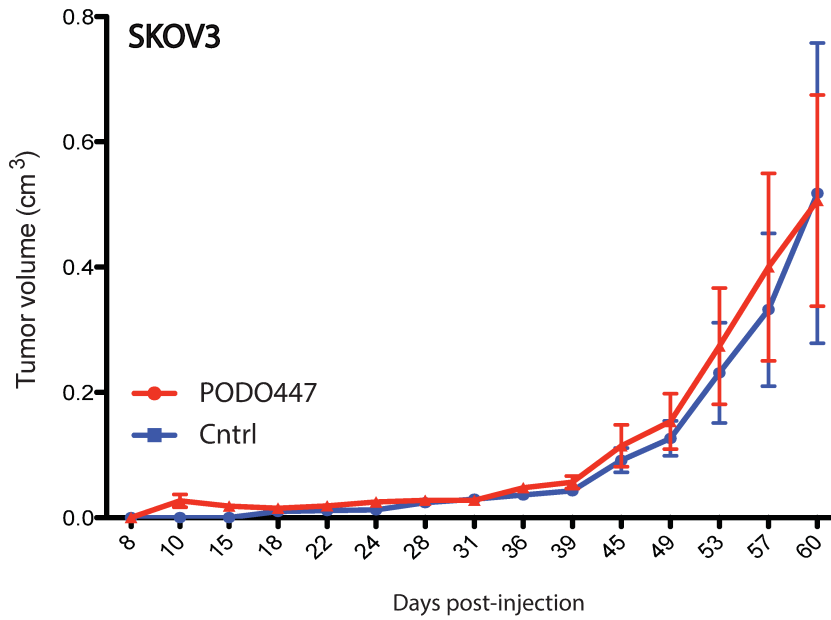

Supplement: jitc-2020-001128supp007.pdf [file jitc-2020-001128supp007.pdf]
